# Supplementary material
Source: PubMed Central journal article supplement (PMC2657180)
Supplement: NIHMS96162-supplement-supplement.pdf [file NIHMS96162-supplement-supplement.pdf]

**A**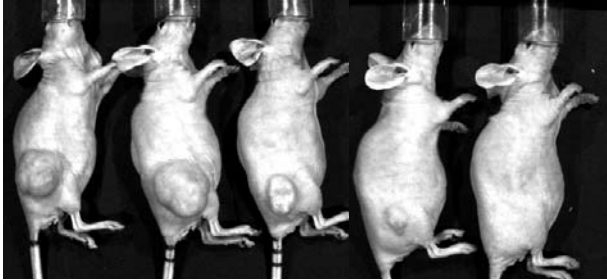**B**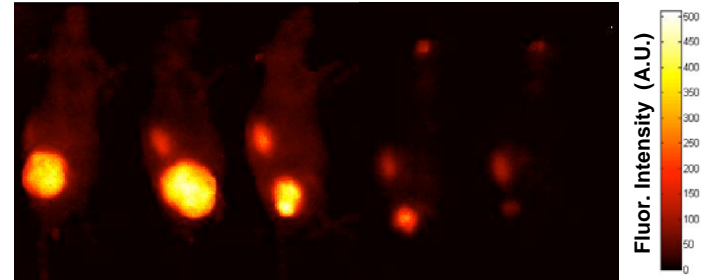**C**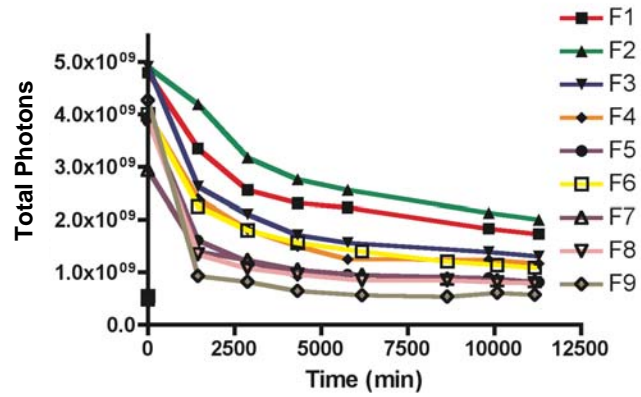**D**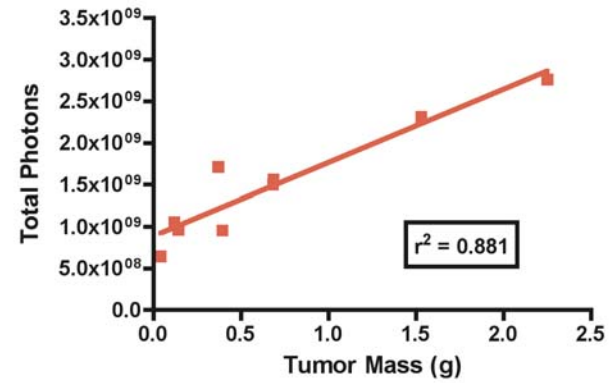

Supplementary Figure 1

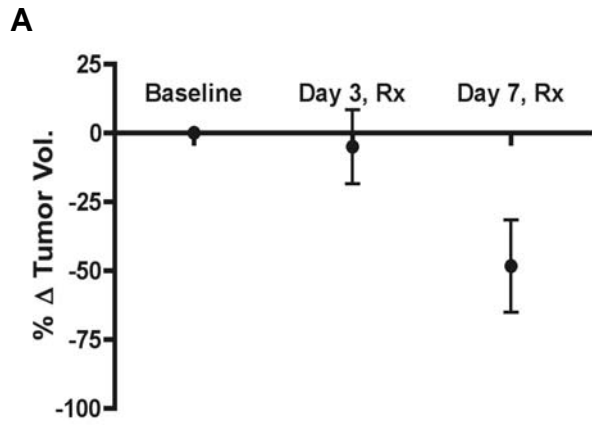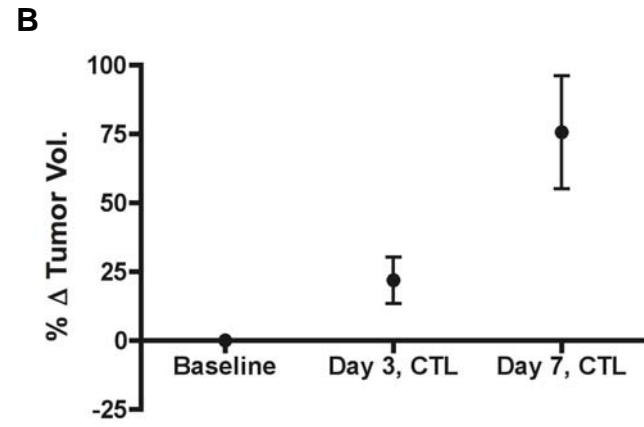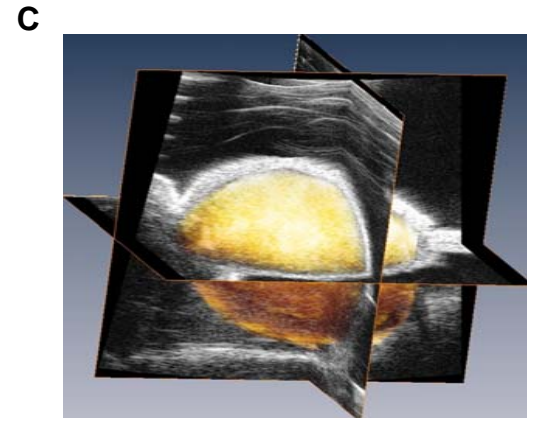

Supplementary Figure 2

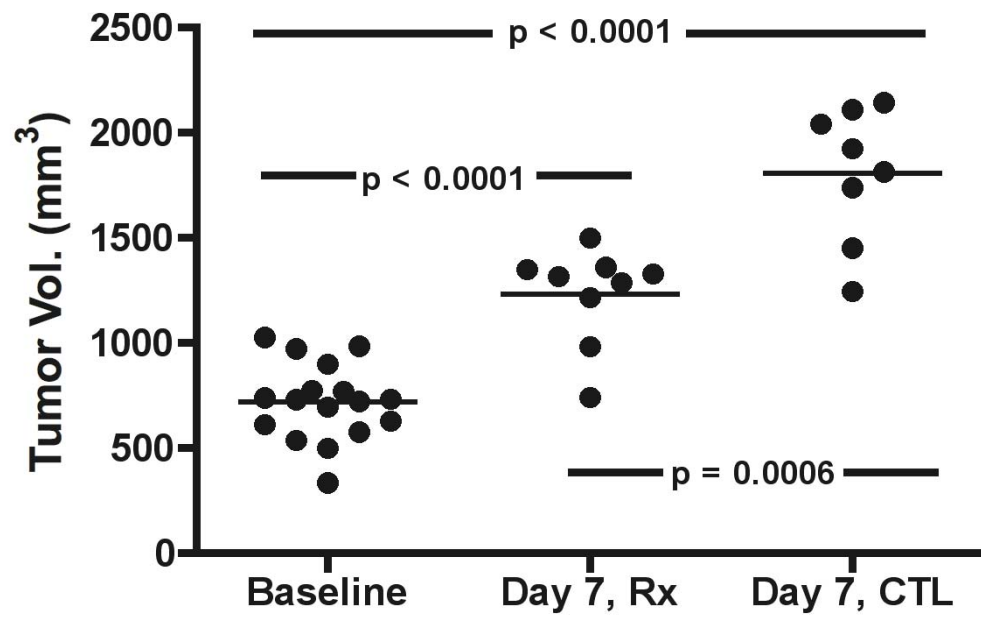

Supplementary Figure 3

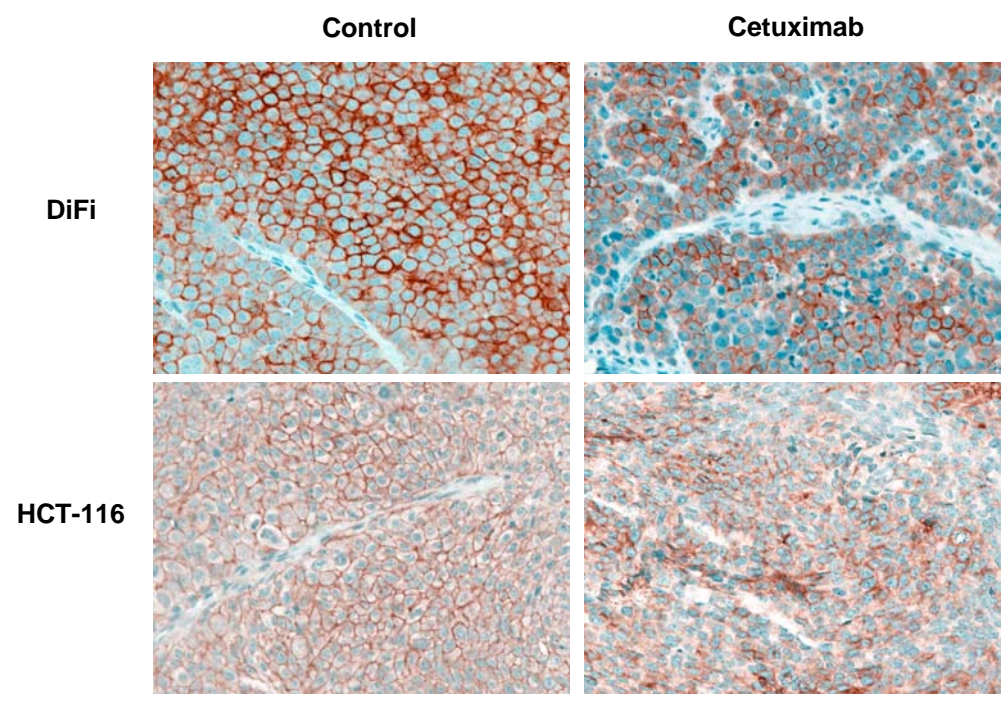

Supplementary Figure 4
